# Supplementary material for: A Hybrid NRPS-PKS Gene Cluster Related to the Bleomycin Family of Antitumor Antibiotics in Alteromonas macleodii Strains
Source: PubMed Central journal article supplement (PMC3777966; doi:10.1371/journal.pone.0076021), 2013-09-19
Supplement: pone.0076021.s001.pdf [file pone.0076021.s001.pdf]

# File S1

## **A hybrid NRPS-PKS gene cluster related to the bleomycin family of antitumor antibiotics in *Alteromonas macleodii* strains**

Carolina Megumi Mizuno<sup>1</sup>, Nikole E. Kimes<sup>1</sup>, Mario López-Pérez<sup>1</sup>, Eva Ausó<sup>1</sup>, Francisco Rodríguez-Valera<sup>1\*</sup> and Rohit Ghai<sup>1</sup>

<sup>1</sup>Evolutionary Genomics Group, Departamento de Producción Vegetal y Microbiología, Universidad Miguel Hernández, San Juan de Alicante, Alicante, Spain

\*frvalera@umh.es

**Table S1. List of all genes and function for predicted genes of the pAMDE1 cluster.**

| <b>ORF identifier</b> | <b>length (aa)</b> | <b>proposed function (domain)</b> | <b>description of blast first hit [taxonomy]</b>                                                    | <b>similarity / identity</b> |
|-----------------------|--------------------|-----------------------------------|-----------------------------------------------------------------------------------------------------|------------------------------|
| ORF86                 | 274                | <i>TnsA endonuclease</i>          | <i>TnsA endonuclease [Escherichia coli]</i>                                                         | 73.16 / 58.82                |
| ORF87                 | 716                | <i>TnsB transposase</i>           | <i>TnsB transposase [Escherichia coli]</i>                                                          | 78.15 / 65.69                |
| ORF88                 | 481                | <i>TnsC ATPase</i>                | <i>TnsC ATPase [Escherichia coli]</i>                                                               | 77.45 / 62.84                |
| ORF89                 | 470                | <i>Hypothetical protein</i>       | <i>conserved hypothetical protein [Vibrio cholerae RC385]</i>                                       | 67.66 / 47.87                |
| ORF90                 | 327                | <i>Unknown protein</i>            | -                                                                                                   | -                            |
| ORF91                 | 40                 | <i>Hypothetical protein</i>       | <i>hypothetical protein MED222_16571 [Vibrio sp. MED222]</i>                                        | 88.57 / 88.57                |
| ORF92                 | 244                | Phosphopantetheinyl transferase   | Phosphopantetheinyl transferase component of siderophore synthetase [Pseudoalteromonas tunicata D2] | 62.18 / 45.38                |
| ORF93                 | 114                | Sh Ble binding protein            | Glyoxalase/bleomycin resistance protein/dioxygenase [Ralstonia pickettii 12J]                       | 65.09 / 46.23                |
| ORF94                 | 1960               | NRPS (CATCA)                      | amino acid adenylation domain-containing protein [Nostoc punctiforme PCC 73102]                     | 55.87 / 36.02                |
| ORF95                 | 196                | NRPS (T)                          | non-ribosomal peptide synthetase, terminal component [Pseudoalteromonas tunicata D2]                | 56.45 / 33.33                |
| ORF96                 | 2200               | NRPS (CATCAT)                     | non-ribosomal peptide synthase [Nostoc sp. 'Peltigera membranacea cyanobiont']                      | 52.06 / 33.83                |
| ORF97                 | 147                | Hypothetical protein              | hypothetical protein VeAt4_02692, partial [Verminephrobacter sp. At4]                               | 56.84 / 35.79                |
| ORF98                 | 309                | beta-hydroxylase                  | beta-hydroxylase [Streptomyces verticillus]                                                         | 56.8 / 39.8                  |
| ORF99                 | 329                | SyrP-like protein, oxygenase      | Taurine catabolism dioxygenase TauD/TfdA [Burkholderia thailandensis MSMB43]                        | 54.1 / 37.7                  |
| ORF100                | 2096               | NRPS (CATCAT)                     | TlmX [Streptoalloteichus hindustanus]                                                               | 53.74 / 35.61                |
| ORF101                | 1126               | NRPS (CAT)                        | amino acid adenylation domain-containing protein [Nostoc punctiforme PCC 73102]                     | 47.48 / 30.19                |
| ORF102                | 1861               | PKS (KS-CM-ACP)                   | beta-ketoacyl synthase [Streptococcus macacae NCTC 11558]                                           | 59.44 / 43.54                |
| ORF103                | 537                | NRPS (C)                          | amino acid adenylation protein [Chitinophaga pinensis DSM 2588]                                     | 44.26 / 26.84                |
| ORF104                | 354                | SyrP-like protein, oxygenase      | oxygenase [Streptomyces flavoviridis]                                                               | 53.24 / 38.13                |
| ORF105                | 1026               | NRPS (AT)                         | peptide synthetase [Nostoc sp. PCC 7120]                                                            | 48.28 / 28.75                |
| ORF106                | 511                | Hypothetical protein              | hypothetical protein RICGR_0543 [Rickettsiella grylli]                                              | 40.52 / 23.42                |
| ORF107                | 300                | Hypothetical protein              | hypothetical protein HCH_02806 [Hahella chejuensis KCTC 2396]                                       | 53.06 / 37.07                |
| ORF108                | 3066               | NRPS (CATCyATCyT)                 | nonribosomal peptide synthase family [Microcoleus chthonoplastes PCC 7420]                          | 48.51 / 30.73                |
| ORF109                | 79                 | MbtH-like protein                 | hypothetical protein sce3255 [Sorangium cellulosum 'So ce 56']                                      | 74.63 / 55.22                |
| ORF110                | 280                | Hypothetical protein              | hypothetical protein Mevan_0493 [Methanococcus vanniellii SB]                                       | 47.16 / 29.55                |

|               |            |                                  |                                                                                                        |                    |
|---------------|------------|----------------------------------|--------------------------------------------------------------------------------------------------------|--------------------|
| ORF111        | 507        | NRPS                             | amino acid adenylation domain-containing protein [Verminephrobacter sp. At4]                           | 43.29 / 21.65      |
| ORF112        | 793        | Acylase                          | penicillin amidase [Teredinibacter turnerae T7901]                                                     | 53.9 / 37.4        |
| ORF113        | 562        | ABC multi-drug transport         | cyclic peptide transporter [Teredinibacter turnerae T7901]                                             | 62.61 / 41.56      |
| ORF114        | 474        | Homospermidine synthase          | homospermidine synthase [Shewanella amazonensis SB2B]                                                  | 59.11 / 39.41      |
| ORF115        | 2721       | NRPS (ACATCA)                    | TlmVI [Streptoalloteichus hindustanus]                                                                 | 47.33 / 29.24      |
| ORF116        | 580        | NRPS (TC)                        | putative multi-domain non-ribosomal peptide synthetase [Candidatus Nitrospira defluvii]                | 45.16 / 28.52      |
| ORF117        | 260        | related to mitomycin antibiotics | protein involved in biosynthesis of mitomycin antibiotics/polyketide fumonisin [Rheinheimera sp. A13L] | 73.12 / 53.36      |
| ORF119        | 253        | Thioesterase                     | predicted thioesterase involved in non-ribosomal peptide biosynthesis [Pseudoalteromonas tunicata D2]  | 77.58 / 57.85      |
| <i>ORF120</i> | <i>32</i>  | <i>Unknown protein</i>           | -                                                                                                      | -                  |
| <i>ORF121</i> | <i>213</i> | <i>Hypothetical protein</i>      | <i>hypothetical protein Rhein_3302 [Rheinheimera sp. A13L]</i>                                         | <i>85.8/72.78</i>  |
| <i>ORF122</i> | <i>534</i> | <i>Hypothetical protein</i>      | <i>hypothetical protein Rhein_3302 [Rheinheimera sp. A13L]</i>                                         | <i>83.52/67.98</i> |
| <i>ORF123</i> | <i>239</i> | <i>Integrase</i>                 | <i>integrase [Burkholderia glumae BGR1]</i>                                                            | <i>51.85/31.48</i> |
| <i>ORF124</i> | <i>95</i>  | <i>Hypothetical protein</i>      | <i>hypothetical protein PFLU5696 [Pseudomonas fluorescens SBW25]</i>                                   | <i>73.68/58.95</i> |
| <i>ORF125</i> | <i>68</i>  | <i>Unknown protein</i>           | -                                                                                                      | -                  |
| <i>ORF126</i> | <i>98</i>  | <i>Unknown protein</i>           | -                                                                                                      | -                  |
| <i>ORF127</i> | <i>159</i> | <i>Unknown protein</i>           | -                                                                                                      | <i>68.46/53.05</i> |
| <i>ORF128</i> | <i>309</i> | <i>Transposase</i>               | <i>transposase [Vibrio anguillarum 775]</i>                                                            | <i>404 / 68.46</i> |

\*Genes flanking the NRPS-PKS hybrid cluster are also shown and are italicized.

**Table S2. C domain motifs identified in the pAMDE1 gene cluster.** Amino acids that differ from the classical C domain motif are shown in red. The numbers at the top are residue identifiers as described in SBSPKS server.

| DOMAIN        | conserved motif |   |    |   |   |   |   |
|---------------|-----------------|---|----|---|---|---|---|
|               | H               | H | Xa | X | X | D | G |
| pAMDE1-94-C1  | H               | H | I  | I | A | D | G |
| pAMDE1-94-C2  | H               | H | I  | G | C | D | G |
| pAMDE1-96-C1  | H               | H | I  | A | V | D | G |
| pAMDE1-96-C2  | H               | H | I  | A | V | D | G |
| pAMDE1-100-C1 | P               | A | M  | F | G | D | K |
| pAMDE1-100-C2 | H               | H | E  | I | I | D | G |
| pAMDE1-101-C1 | H               | H | L  | I | I | D | E |
| pAMDE1-103-C1 | H               | H | I  | C | S | D | G |
| pAMDE1-108-C1 | H               | H | L  | I | S | D | A |
| pAMDE1-108-C2 | Q               | M | I  | M | I | D | L |
| pAMDE1-108-C3 | D               | L | I  | V | A | D | T |
| pAMDE1-115-C1 | H               | H | A  | I | C | D | F |
| pAMDE1-115-C2 | -               | E | V  | S | M | D | G |
| pAMDE1-116-C1 | H               | H | L  | I | L | D | G |

**Table S3. Gene comparison of pAMDE1 to BLM, TLM and ZBM clusters.**

| pAMDE1 | length (aa) | Streptomyces<br>verticillus<br>ATCC15003 | similarity / identity | Streptoalloteichus<br>hindustanus E465-4<br>ATCC 31158 | similarity / identity | Streptomyces flavoridis<br>ATCC 21892        | similarity / identity |
|--------|-------------|------------------------------------------|-----------------------|--------------------------------------------------------|-----------------------|----------------------------------------------|-----------------------|
| ORF93  | 114         | -                                        | -                     | <b>TlmA Sh Ble binding protein (ABL74956.1)</b>        | <b>53.1 / 33.63</b>   | <b>zbmA zbm binding protein (ACG60763.1)</b> | <b>53.04 / 34.78</b>  |
| ORF94  | 1960        | NRPS11-10<br>(AAG02349.1)                | 48.29 / 30.14         | TlmVI NRPS5-4<br>(ABL74940.1)                          | 46.75 / 28.91         | zbmVI NRPS5-4<br>(ACG60776.1)                | 43.39 / 26.55         |
| ORF95  | 196         | blmX NRPS9-8<br>(AAG02355.1)             | 52.94 / 30            | TlmX NRPS9-8<br>(ABL74936.1)                           | 51.76 / 31.76         | zbmX NRPS9-8<br>(ACG60782.1)                 | 51.2 / 31.93          |
| ORF96  | 2200        | NRPS11-10<br>(AAG02349.1)                | 46.38 / 31.41         | TlmIV NRPS2-1<br>(ABL74945.1)                          | 44.62 / 27.55         | ZbmIV NRPS2-1<br>(ACG60772.1)                | 42.58 / 26.47         |
| ORF98  | 309         | -                                        | -                     | <b>Tlm Orf10 hydroxylase (ABL74955.1)</b>              | <b>57.48 / 37.41</b>  | <b>Zbm-Orf30 hydroxylase (ACG60751.1)</b>    | <b>59.03 / 40.28</b>  |
| ORF99  | 329         | SyrP-like protein<br>(AAG02342.1)        | 52.1 / 36.01          | TlmR3 SyrP-like<br>regulatory protein<br>(ABL74947.1)  | 53.23 / 34.84         | Zbm-Orf19 oxygenase<br>(ACG60747.1)          | 53.26 / 37.68         |
| ORF100 | 2096        | blmX NRPS9-8<br>(AAG02355.1)             | 52.43 / 35.21         | TlmX NRPS9-8<br>(ABL74936.1)                           | 53.74 / 35.61         | zbmX NRPS9-8<br>(ACG60782.1)                 | 53.04 / 35.78         |
| ORF101 | 1126        | blm IX NRPS7<br>(AAG02356.1)             | 41.96 / 25.78         | TlmIX NRPS7<br>(ABL74937.1)                            | 44.41 / 26.35         | zbmIX NRPS7<br>(ACG60773.1)                  | 42.75 / 25.02         |
| ORF102 | 1861        | blm VIII PKS<br>(AAG02357.1)             | 52.62 / 38.12         | TlmVIII PKS<br>(ABL74938.1)                            | 53.21 / 37.87         | zbmVIII PKS<br>(ACG60781.1)                  | 42.85 / 27.97         |
| ORF103 | 537         | blmVII NRPS6<br>(AAG02358.1)             | 38.36 / 22.64         | TlmVII NRPS6<br>(ABL74939.1)                           | 38.82 / 23.73         | ZbmIV NRPS2-1<br>(ACG60772.1)                | 42.52 / 25.7          |
| ORF104 | 354         | SyrP-like protein<br>(AAG02342.1)        | 51.19 / 34.81         | TlmR3 SyrP-like<br>regulatory protein<br>(ABL74947.1)  | 52.96 / 34.84         | Zbm-Orf19 oxygenase<br>(ACG60747.1)          | 53.24 / 38.13         |
| ORF105 | 1026        | blmVII NRPS6<br>(AAG02358.1)             | 43.31 / 26.87         | TlmVI NRPS5-4<br>(ABL74940.1)                          | 44.73 / 26.81         | ZbmIV NRPS2-1<br>(ACG60772.1)                | 46.9 / 30.09          |
| ORF108 | 3066        | blmIV NRPS2-1<br>(AAG02364.1)            | 46.84 / 30.67         | TlmIV NRPS2-1<br>(ABL74945.1)                          | 48.6 / 31.02          | ZbmIV NRPS2-1<br>(ACG60772.1)                | 46.29 / 30.51         |
| ORF109 | 79          | MbtH-like protein<br>(AAG02368.1)        | 76.79 / 57.14         | Tlm Orf16 MbtH-like<br>protein (ABL74949.1)            | 77.42 / 54.84         | Zbm-Orf21 unknown<br>(ACG60748.1)            | 77.78 / 59.26         |
| ORF111 | 507         | NRPS11-10<br>(AAG02349.1)                | 37.28 / 22.78         | -                                                      | -                     | ZbmIV NRPS2-1<br>(ACG60772.1)                | 45.34 / 28.57         |

|        |      |                                      |                      |                                                       |                      |                                                               |                      |
|--------|------|--------------------------------------|----------------------|-------------------------------------------------------|----------------------|---------------------------------------------------------------|----------------------|
| ORF112 | 793  | -                                    | -                    | -                                                     | -                    | <b>Zbm-Orf4 acylase<br/>(ACG60745.1)</b>                      | <b>39.1 / 23.08</b>  |
| ORF113 | 562  | -                                    | -                    | <b>TlmT ABC multi-drug<br/>transport (ABL74935.1)</b> | <b>43.27 / 20.18</b> | <b>Zbm-Orf38 ABC<br/>transporter<br/>(ACG60758.1)</b>         | <b>45.65 / 26.09</b> |
| ORF115 | 2721 | blmVI NRPS5-4-3<br>(AAG02359.1)      | 47.12 / 31.66        | TlmVI NRPS5-4-3<br>(ABL74940.1)                       | 47.33 / 29.24        | zbmVI NRPS5-4<br>(ACG60776.1)                                 | 44.54 / 27.4         |
| ORF116 | 580  | blmV NRPS3CT<br>(AAG02360.1)         | 42.7 / 27.03         | TlmV NRPS3CT<br>(ABL74945.1)                          | 42 / 26.91           | zbmV NRPS3CT<br>(ACG60775.1)                                  | 43.61 / 28.8         |
| ORF119 | 253  | <b>thioesterase<br/>(AAG02346.1)</b> | <b>41.06 / 26.83</b> | -                                                     | -                    | <b>Zbm-Orf(-1) putative<br/>thioesterase<br/>(ACG60736.1)</b> | <b>47.09 / 28.7</b>  |

---

**Table S4. C domain motifs of pAMDE1 in comparison to the BLM, TLM and ZBM motifs.** Amino acids that differ from the classical C domain motif are shown in red. The numbers at the top are residue identifiers as described in SBSPKS server.

|        |                      | conserved motif |          |          |          |          |          |          |
|--------|----------------------|-----------------|----------|----------|----------|----------|----------|----------|
| DOMAIN |                      | H               | H        | Xa       | X        | X        | D        | G        |
| BlmIV  | (NRPS-2)             | H               | H        | A        | V        | T        | D        | G        |
| TlmIV  | (NRPS-2)             | H               | H        | I        | A        | I        | D        | G        |
| ZbmIV  | (NRPS-2)             | H               | H        | A        | V        | T        | D        | G        |
|        | <b>pAMDE1-108-C1</b> | <b>H</b>        | <b>H</b> | <b>L</b> | <b>I</b> | <b>S</b> | <b>D</b> | <b>A</b> |
| BlmV   | (NRPS-3,C0)          | H               | H        | L        | V        | L        | D        | G        |
| TlmV   | (NRPS-3,C0)          | H               | H        | L        | I        | L        | D        | G        |
| ZbmV   | (NRPS-3,C0)          | H               | H        | L        | I        | L        | D        | G        |
|        | <b>pAMDE1-116-C1</b> | <b>H</b>        | <b>H</b> | <b>L</b> | <b>I</b> | <b>L</b> | <b>D</b> | <b>G</b> |
| BlmVI  | (NRPS-3)             | S               | S        | F        | A        | L        | D        | G        |
| TlmVI  | (NRPS-3)             | S               | S        | F        | G        | L        | D        | G        |
| ZbmVI  | (NRPS-3)             | S               | S        | F        | G        | L        | D        | G        |
|        | <b>pAMDE1-115-C2</b> | <b>-</b>        | <b>E</b> | <b>V</b> | <b>S</b> | <b>M</b> | <b>D</b> | <b>G</b> |
| BlmVI  | (NRPS-4)             | H               | H        | L        | V        | A        | D        | F        |
| TlmVI  | (NRPS-4)             | H               | H        | L        | L        | A        | D        | F        |
| ZbmVI  | (NRPS-4)             | H               | H        | L        | V        | A        | D        | Y        |
|        | <b>pAMDE1-115-C1</b> | <b>H</b>        | <b>H</b> | <b>A</b> | <b>I</b> | <b>C</b> | <b>D</b> | <b>F</b> |
| BlmVII | (NRPS-6)             | H               | H        | I        | A        | S        | D        | G        |
| TlmVII | (NRPS-6)             | H               | H        | I        | A        | S        | D        | G        |
| ZbmVII | (NRPS-6)             | H               | H        | I        | A        | G        | D        | G        |
|        | <b>pAMDE1-103-C1</b> | <b>H</b>        | <b>H</b> | <b>I</b> | <b>C</b> | <b>S</b> | <b>D</b> | <b>G</b> |
| BlmIX  | (NRPS-7)             | H               | H        | I        | V        | F        | D        | G        |
| TlmIX  | (NRPS-7)             | H               | H        | I        | V        | F        | D        | G        |
| ZbmIX  | (NRPS-7)             | H               | H        | I        | V        | F        | D        | G        |
|        | <b>pAMDE1-101-C1</b> | <b>H</b>        | <b>H</b> | <b>L</b> | <b>I</b> | <b>I</b> | <b>D</b> | <b>E</b> |
| BlmX   | (NRPS-8)             | H               | H        | E        | I        | V        | D        | G        |
| TlmX   | (NRPS-8)             | H               | H        | E        | I        | V        | D        | G        |
| ZbmX   | (NRPS-8)             | H               | H        | E        | I        | V        | D        | G        |
|        | <b>pAMDE1-100-C2</b> | <b>H</b>        | <b>H</b> | <b>E</b> | <b>I</b> | <b>I</b> | <b>D</b> | <b>G</b> |
| BlmX   | (NRPS-9)             | H               | A        | L        | V        | A        | D        | R        |
| TlmX   | (NRPS-9)             | H               | A        | L        | V        | G        | D        | R        |
| ZbmX   | (NRPS-9)             | S               | V        | L        | A        | A        | D        | R        |
|        | <b>pAMDE1-100-C1</b> | <b>P</b>        | <b>A</b> | <b>M</b> | <b>F</b> | <b>G</b> | <b>D</b> | <b>K</b> |

  

|        |                      | cyclization conserved motif |          |          |          |          |          |          |          |
|--------|----------------------|-----------------------------|----------|----------|----------|----------|----------|----------|----------|
| DOMAIN |                      | D                           | Xa       | X        | X        | X        | D        | X        | X        |
| BlmIV  | (NRPS-0)             | D                           | L        | L        | I        | A        | D        | A        | H        |
| TlmIV  | (NRPS-0)             | D                           | L        | L        | I        | A        | D        | A        | H        |
| ZbmIV  | (NRPS-0)             | D                           | L        | L        | I        | A        | D        | A        | H        |
|        | <b>pAMDE1-108-C3</b> | <b>D</b>                    | <b>L</b> | <b>I</b> | <b>V</b> | <b>A</b> | <b>D</b> | <b>T</b> | <b>-</b> |
| BlmIV  | (NRPS-1)             | D                           | A        | L        | I        | C        | D        | A        | H        |
| TlmIV  | (NRPS-1)             | D                           | A        | L        | I        | C        | D        | A        | Y        |
| ZbmIV  | (NRPS-1)             | D                           | S        | L        | V        | C        | D        | A        | H        |
|        | <b>pAMDE1-108-C2</b> | <b>Q</b>                    | <b>M</b> | <b>I</b> | <b>M</b> | <b>I</b> | <b>D</b> | <b>L</b> | <b>-</b> |

**Table S5. A domain motifs and amino acid specificity of pAMDE1 in comparison to that of BLM, TLM and ZBM.** Amino acids that differ from the BLM, TLM and ZBM domain motifs are shown in red. The numbers at the top are residue identifiers as described in NRPSpredictor2 and SBSPKS server.

| DOMAIN |                      | 235      | 236      | 239      | 278      | 299      | 301      | 322      | 330      | 331      | 517      | SUBSTRATE                     |
|--------|----------------------|----------|----------|----------|----------|----------|----------|----------|----------|----------|----------|-------------------------------|
|        | L-Cys(2)             | D        | L        | Y        | N        | L        | S        | L        | I        | W        | K        |                               |
| BlmIV  | (NRPS-1)             | D        | L        | Y        | N        | L        | S        | L        | I        | W        | K        | L-Cys(2)                      |
| TlmIV  | (NRPS-1)             | D        | L        | Y        | N        | M        | S        | L        | I        | W        | K        | L-Cys(2)                      |
| ZbmIV  | (NRPS-1)             | D        | L        | Y        | N        | L        | S        | L        | I        | W        | K        | L-Cys(2)                      |
|        | <b>pAMDE1-108-A2</b> | <b>D</b> | <b>L</b> | <b>Y</b> | <b>N</b> | <b>L</b> | <b>S</b> | <b>L</b> | <b>I</b> | <b>W</b> | <b>-</b> | <b>L-Cys(2)</b>               |
|        | $\beta$ -Ala         | V        | D        | Xb       | V        | I        | S        | Xb       | G        | D        | K        |                               |
| BlmIV  | (NRPS-2)             | V        | D        | W        | V        | I        | S        | L        | A        | D        | K        | $\beta$ -Ala                  |
| TlmIV  | (NRPS-2)             | V        | D        | W        | V        | V        | S        | L        | A        | D        | K        | $\beta$ -Ala                  |
| ZbmIV  | (NRPS-2)             | V        | D        | A        | L        | V        | S        | L        | A        | D        | K        | $\beta$ -Ala                  |
|        | <b>pAMDE1-108-A1</b> | <b>V</b> | <b>D</b> | <b>A</b> | <b>T</b> | <b>V</b> | <b>S</b> | <b>I</b> | <b>A</b> | <b>D</b> | <b>K</b> | <b><math>\beta</math>-Ala</b> |
|        | L-Asn                | D        | L        | T        | K        | L        | G        | E        | V        | G        | K        |                               |
| BlmVI  | (NRPS-3)             | D        | L        | T        | K        | V        | G        | E        | V        | G        | K        | L-Asn                         |
| TlmVI  | (NRPS-3)             | D        | L        | T        | K        | V        | G        | E        | V        | G        | K        | L-Asn                         |
| ZbmVI  | (NRPS-3)             | D        | L        | T        | K        | V        | G        | E        | V        | G        | K        | L-Asn                         |
|        | <b>pAMDE1-115-A3</b> | <b>D</b> | <b>M</b> | <b>T</b> | <b>K</b> | <b>L</b> | <b>G</b> | <b>E</b> | <b>V</b> | <b>G</b> | <b>K</b> | <b>L-Asn</b>                  |
|        | L-Asn                | D        | L        | T        | K        | L        | G        | E        | V        | G        | K        |                               |
| BlmX   | (NRPS-9)             | D        | L        | T        | K        | V        | G        | E        | V        | G        | K        | L-Asn                         |
| TlmX   | (NRPS-9)             | D        | L        | T        | K        | V        | G        | E        | V        | G        | K        | L-Asn                         |
| ZbmX   | (NRPS-9)             | D        | F        | T        | K        | V        | G        | E        | V        | G        | K        | L-Asn                         |
|        | <b>pAMDE1-100-A1</b> | <b>D</b> | <b>L</b> | <b>T</b> | <b>K</b> | <b>V</b> | <b>G</b> | <b>E</b> | <b>V</b> | <b>G</b> | <b>K</b> | <b>L-Asn</b>                  |
|        | L-Ser                | D        | V        | W        | H        | L        | S        | L        | I        | D        | K        |                               |
| BlmVI  | (NRPS-4)             | D        | V        | W        | H        | V        | S        | L        | V        | D        | K        | L-Ser                         |
| TlmVI  | (NRPS-4)             | D        | V        | W        | H        | V        | S        | L        | V        | D        | K        | L-Ser                         |
| ZbmVI  | (NRPS-4)             | D        | V        | W        | H        | L        | S        | L        | I        | D        | K        | L-Ser                         |
|        | <b>pAMDE1-115-A2</b> | <b>D</b> | <b>V</b> | <b>W</b> | <b>H</b> | <b>I</b> | <b>S</b> | <b>L</b> | <b>I</b> | <b>D</b> | <b>K</b> | <b>L-Ser</b>                  |
|        | L-Thr                | D        | F        | W        | N        | I        | G        | M        | V        | H        | K        |                               |
| BlmVII | (NRPS-6)             | D        | F        | W        | S        | V        | G        | M        | I        | H        | K        | L-Thr                         |
| TlmVII | (NRPS-6)             | D        | F        | W        | G        | V        | G        | M        | V        | H        | K        | L-Thr                         |
|        | <b>pAMDE1-105-A1</b> | <b>D</b> | <b>A</b> | <b>W</b> | <b>Q</b> | <b>V</b> | <b>G</b> | <b>V</b> | <b>I</b> | <b>H</b> | <b>K</b> | <b>Gln</b>                    |
|        | L-Ala                | D        | L        | F        | N        | N        | A        | L        | T        | Y        | K        | L-Ala                         |
| BlmIX  | (NRPS-7)             | D        | L        | F        | N        | N        | A        | L        | T        | Y        | K        | L-Ala                         |
| TlmIX  | (NRPS-7)             | D        | L        | F        | N        | N        | A        | L        | T        | Y        | K        | L-Ala                         |
|        | <b>pAMDE1-101-A1</b> | <b>D</b> | <b>V</b> | <b>F</b> | <b>T</b> | <b>Y</b> | <b>A</b> | <b>L</b> | <b>V</b> | <b>Y</b> | <b>K</b> | <b>Phe</b>                    |
|        | L-His                | D        | S        | Xb       | L        | Xb       | A        | E        | V        | Xb       | K        |                               |
| BlmX   | (NRPS-8)             | D        | S        | A        | L        | I        | A        | E        | V        | W        | K        | L-His                         |
| TlmX   | (NRPS-8)             | D        | S        | A        | L        | V        | A        | E        | V        | W        | K        | L-His                         |
| ZbmX   | (NRPS-8)             | D        | S        | V        | L        | T        | A        | E        | V        | W        | K        | L-His                         |
|        | <b>pAMDE1-100-A2</b> | <b>D</b> | <b>S</b> | <b>A</b> | <b>L</b> | <b>I</b> | <b>A</b> | <b>E</b> | <b>V</b> | <b>W</b> | <b>K</b> | <b>L-His</b>                  |



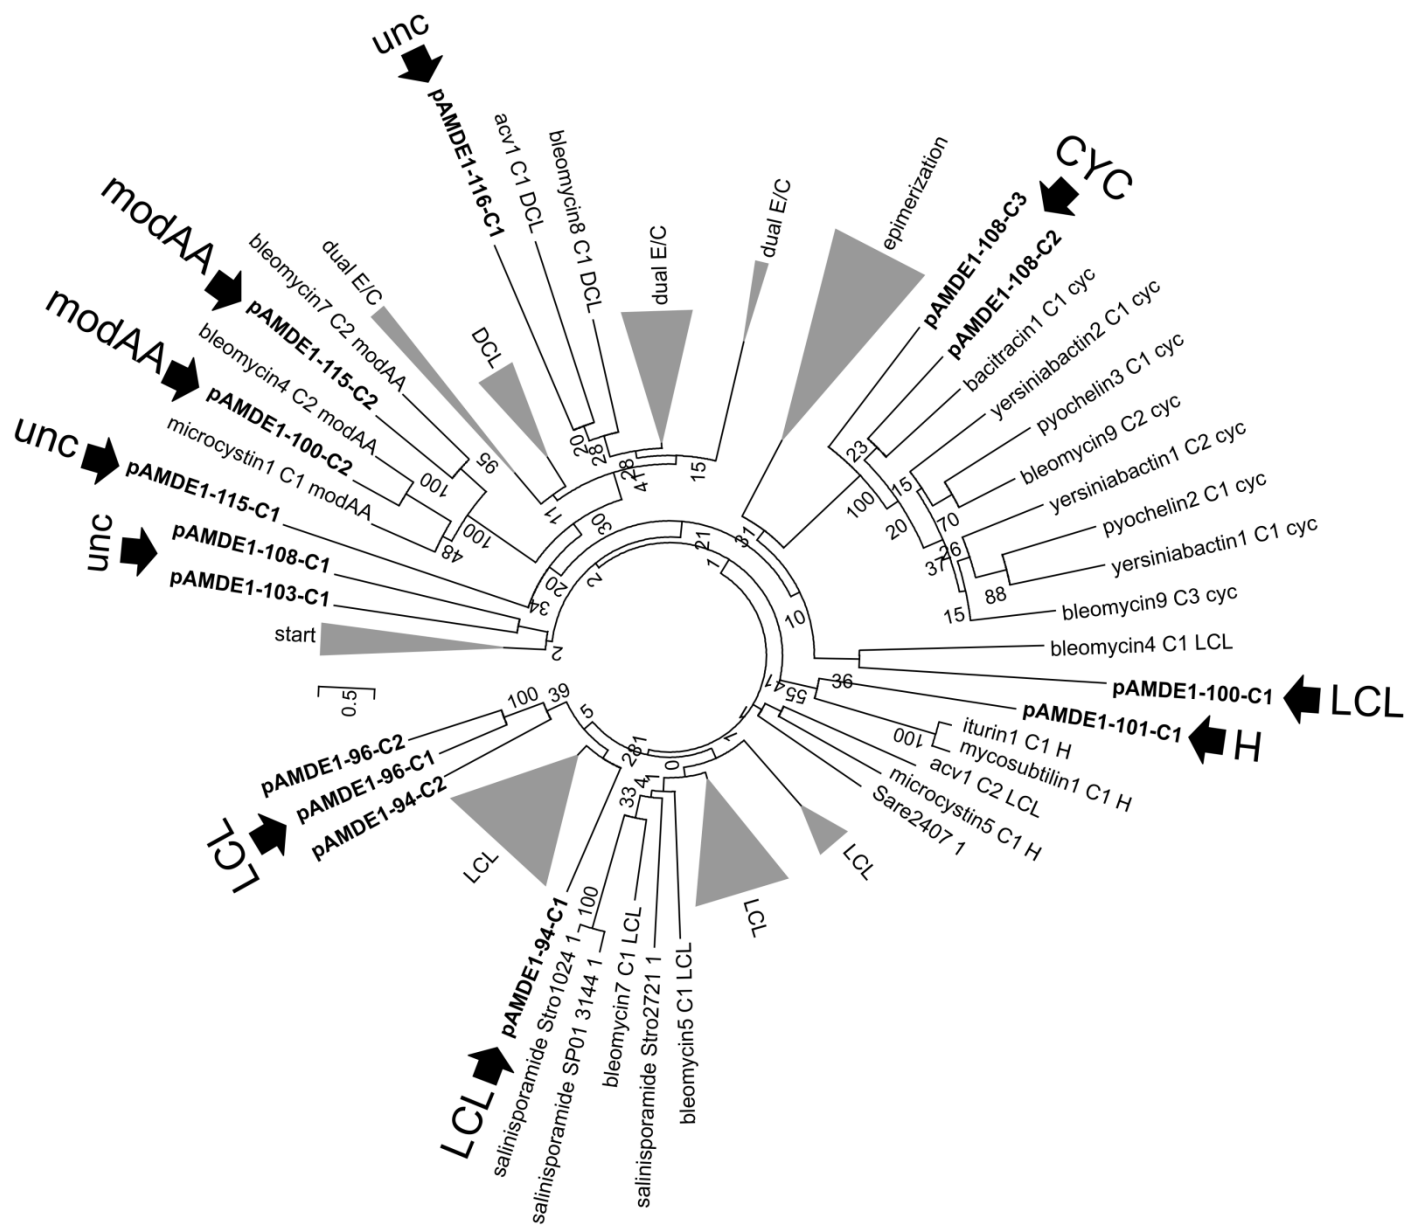

**Figure S1. Phylogenetic tree of C domains.** All known categories of C domains are shown. C domains of pAMDE1 are highlighted in bold. LCL: catalyzes peptide bond formation between 2 L-amino acids, DCL: catalyzes peptide bond formation between a D- and L- amino acid, CYC: heterocyclization domain, epimerization: flips chirality of last amino acid, dual E/C: catalyze both epimerization and condensation, modAA: modify the incorporated amino acids, H: hybrid, UNC: unclassified. Bootstrap values are shown on the branches.

A

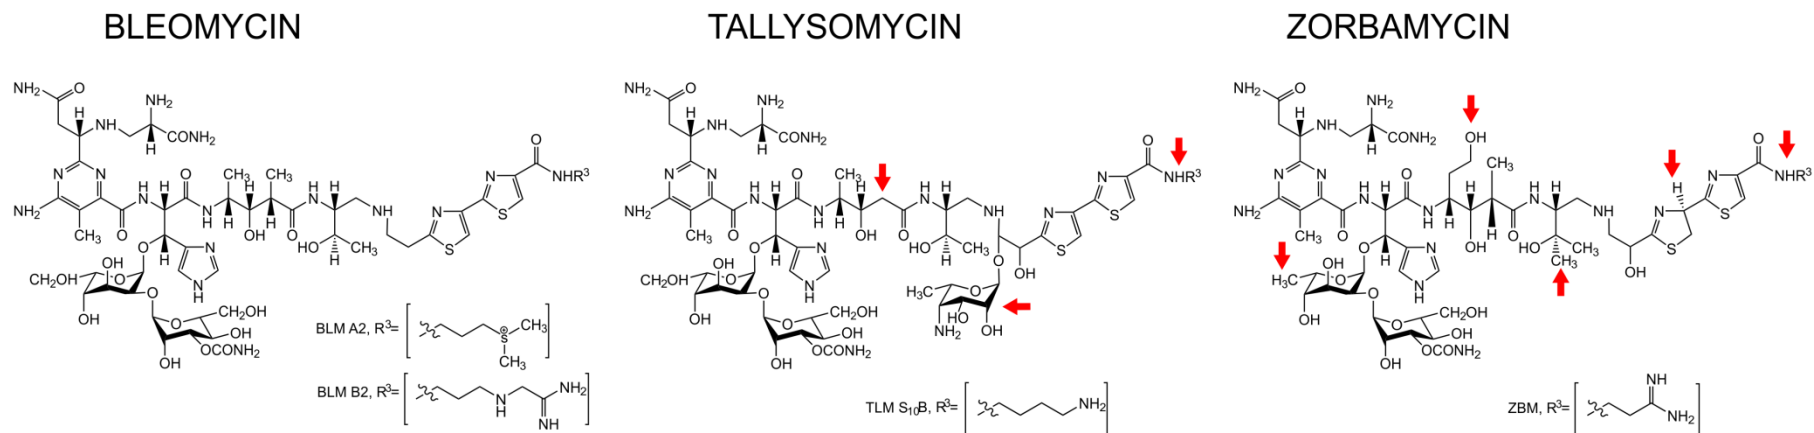

B

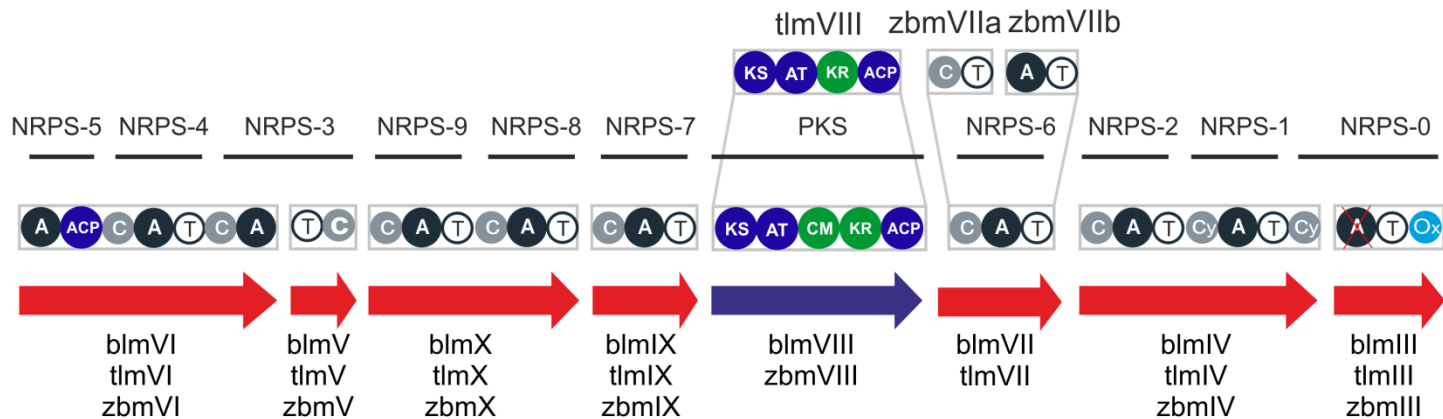

**Figure S2. Bleomycin family of antitumor antibiotics.** A) Structure of BLM, TLM and ZBM. Structural differences are highlighted with red arrows. B) Gene cluster representation and protein domains of bleomycin (blm), tallysomycin (tlm) and zorbamycin (zbm). The protein domains are shown inside the boxes. The modules (NRPS-0 to NRPS-9) described for the bleomycin compounds are represented by the black lines above the domains. The NRPS genes are represented by red arrows, and the PKS gene is represented by a blue arrow.

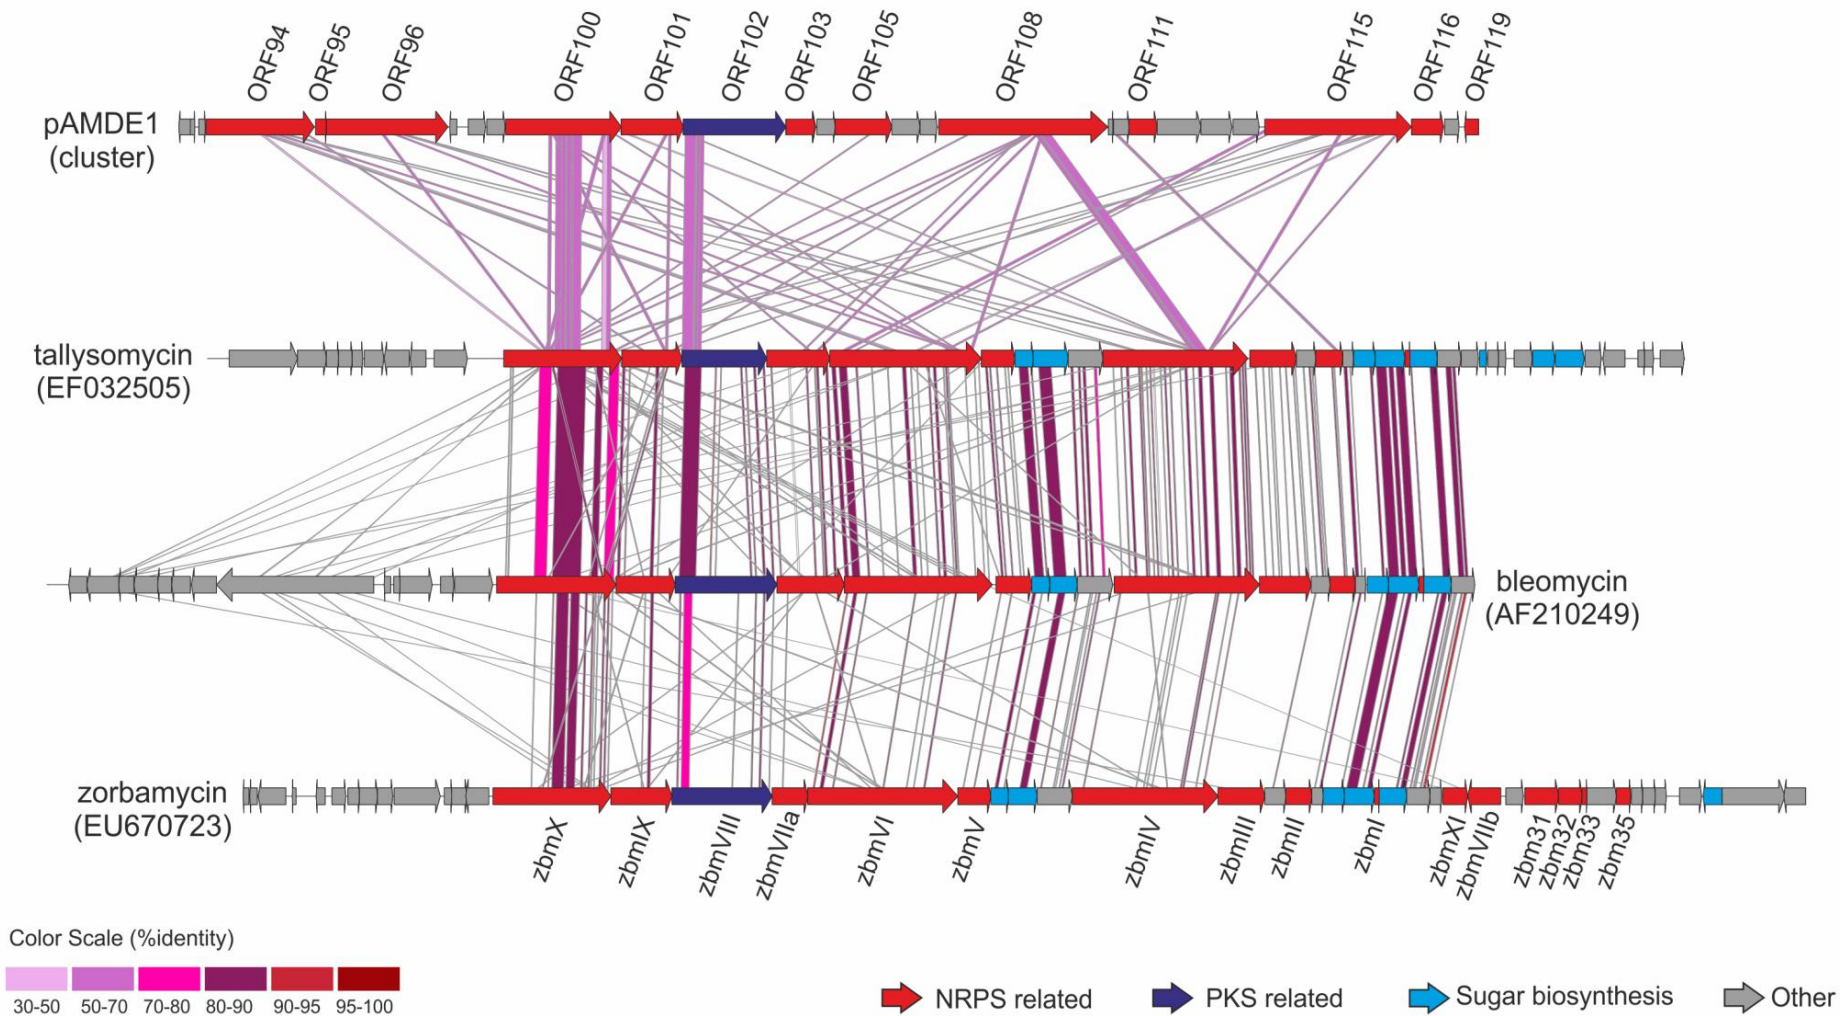

**Figure S3. Cluster comparison of pAMDE1 to BLM, TLM and ZBM.** All genes are colored according to the inferred function. Although all-versus-all comparisons (using BLASTN) were made, only selected pairwise comparisons are shown for clarity. The level of similarity between different contigs is indicated in the legend on the left. The name of the genes of pAMDE1 (represented by ORFs) and zorbamycin are shown.

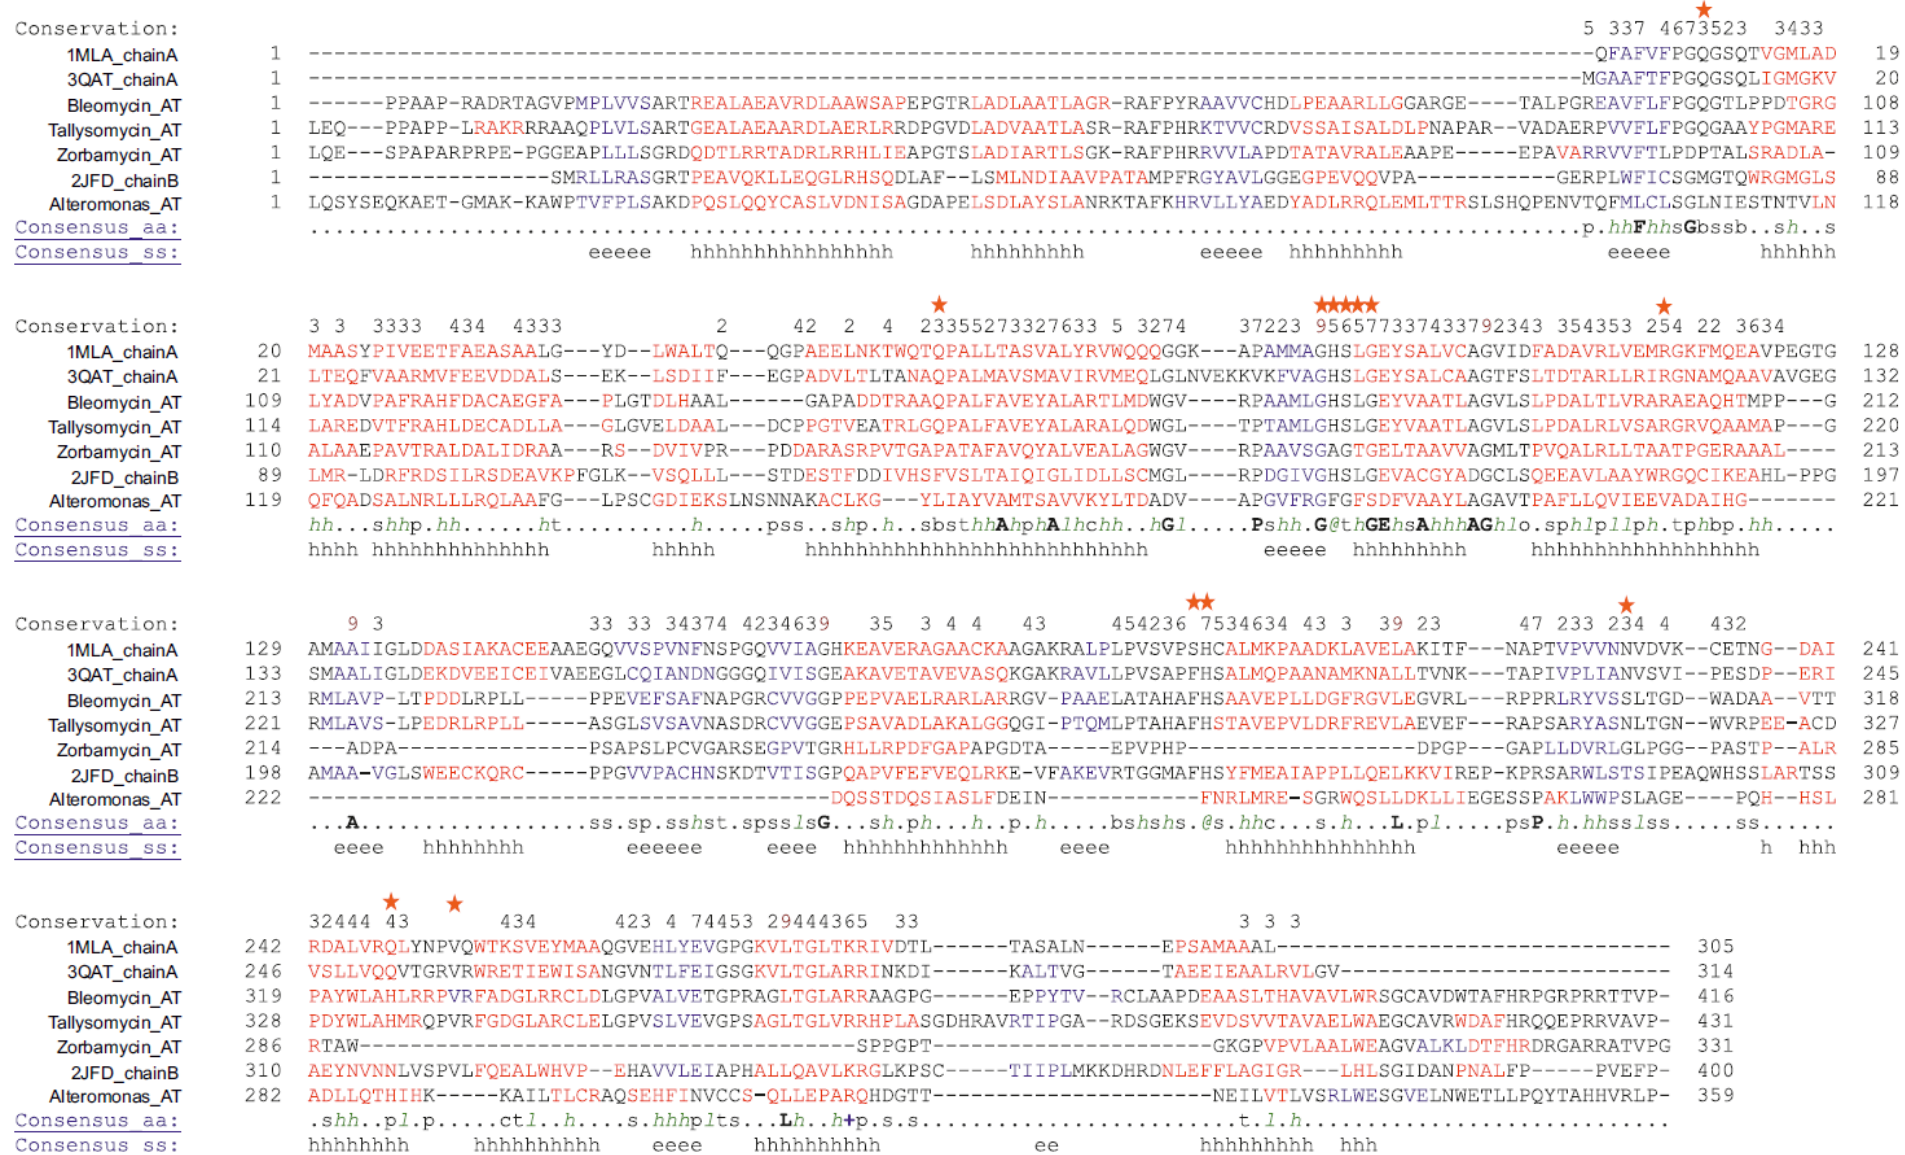

**Figure S4. Structural alignment.** Acyltransferase domains from four sequences of the bleomycin family and three known protein structures (PDB codes: 1MLA, 3QAT, 2JFD) are shown in the alignment. The alignment was created using the PROMALS3D web server. The first line in each block shows conservation indices for positions with a conservation index above 2. The last two lines show consensus amino acid sequence (Consensus\_aa) and consensus predicted secondary structures (Consensus\_ss). Consensus amino acid symbols are: conserved amino acids are in bold and uppercase letters; aliphatic: l; aromatic: @; hydrophobic: h; alcohol: o; polar residues: p; t; t; t; s; bulky residues: b; positively charged: +; negatively charged: -; charged: c. Known active site residues in the protein structure of 1MLA are indicated by an orange star symbol on top.
